# Supplementary material for: CRELD1 is an evolutionarily-conserved maturational enhancer of ionotropic acetylcholine receptors
Source: eLife journal article supplement (doi:10.7554/elife.39649), 2018-11-07
Supplement: supp [file elife-39649-supp-v1.zip]

A

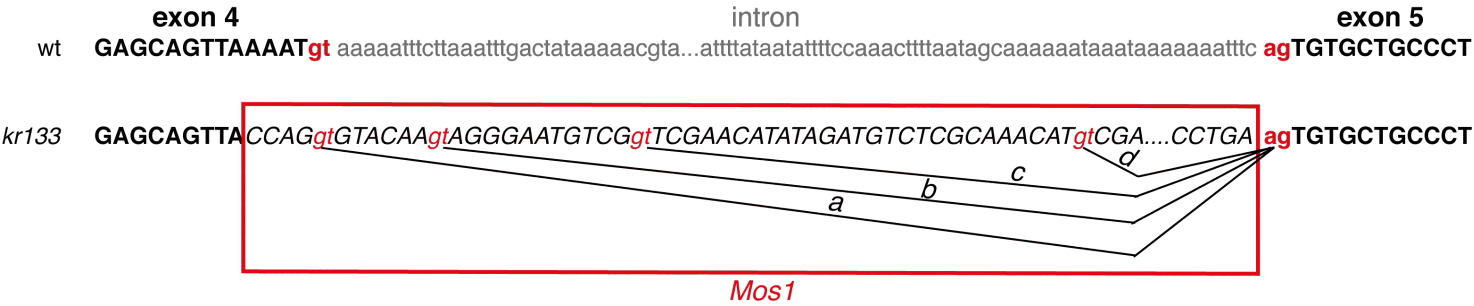

B

|                |                                                                                     |
|----------------|-------------------------------------------------------------------------------------|
| wt             | GAGCAGTTAAAATTGTGCTGCCCT                                                            |
|                | E Q L K L C C P                                                                     |
| <i>kr133 a</i> | GAGCAGTTA <b>CCAGTGTGCTGCCCT</b>                                                    |
|                | E Q L <b>P V C C P</b>                                                              |
| <i>kr133 b</i> | GAGCAGTTA <b>CCAGgtGTACAATGTGCTGCCCT</b>                                            |
|                | E Q L <b>P G V Q C A A</b>                                                          |
| <i>kr133 c</i> | GAGCAGTTA <b>CCAGgtGTACAAgtAGGGAATGTCGTGTGCTGCCCT</b>                               |
|                | E Q L <b>P G V Q V G N V V C C P</b>                                                |
| <i>kr133 d</i> | GAGCAGTTA <b>CCAGgtGTACAAgtAGGGAATGTCGgtTCGAACATATAGATGTCTCGCAAACAT</b> TGTGCTGCCCT |
|                | E Q L <b>P G V Q V G N V G S N I * M S R K H C A A</b>                              |
