# Supplementary figures and images for: CRELD1 is an evolutionarily-conserved maturational enhancer of ionotropic acetylcholine receptors
Source: eLife journal article supplement (doi:10.7554/elife.39649), 2018-11-07

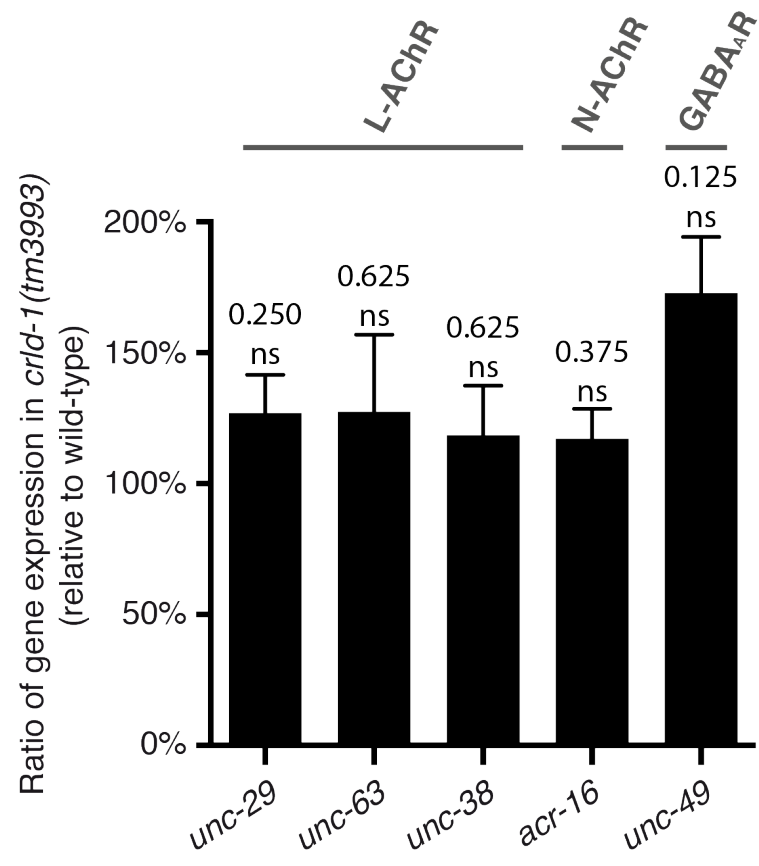

Supplement: supp [file elife-39649-supp-v1.zip]

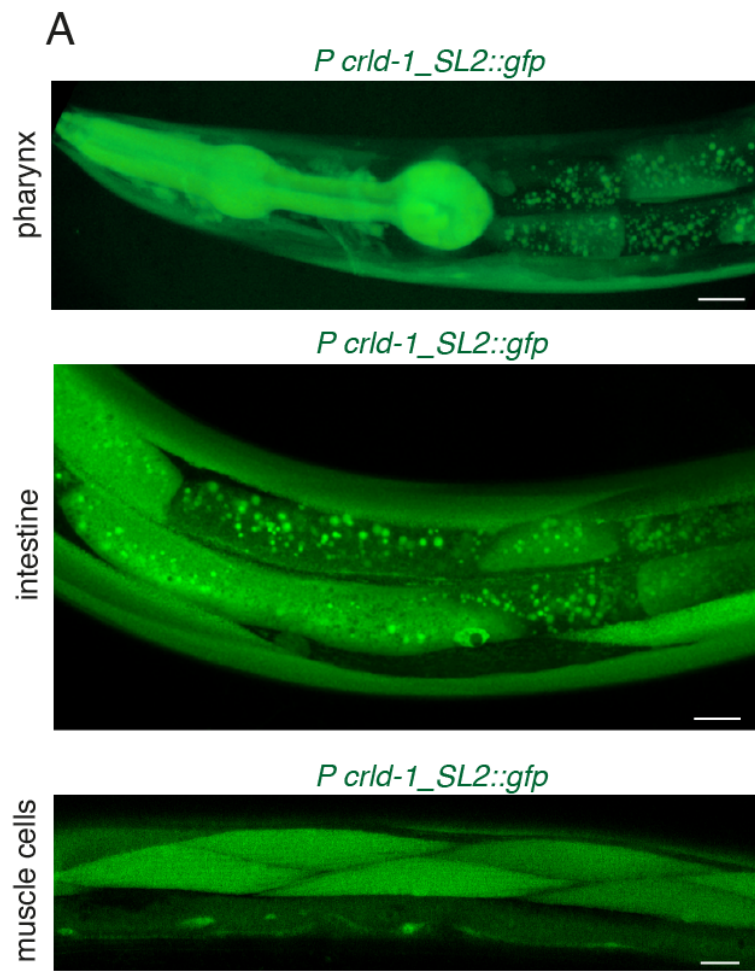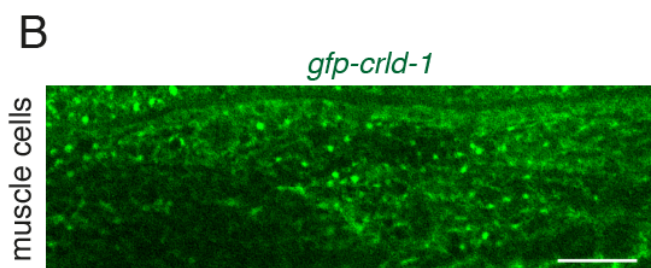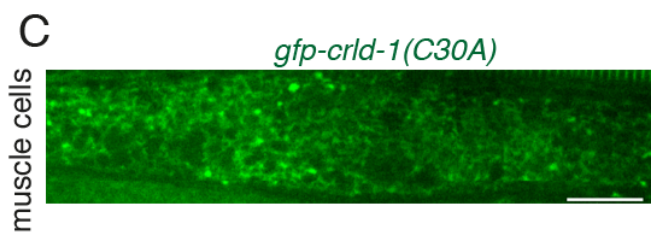

Supplement: supp [file elife-39649-supp-v1.zip]

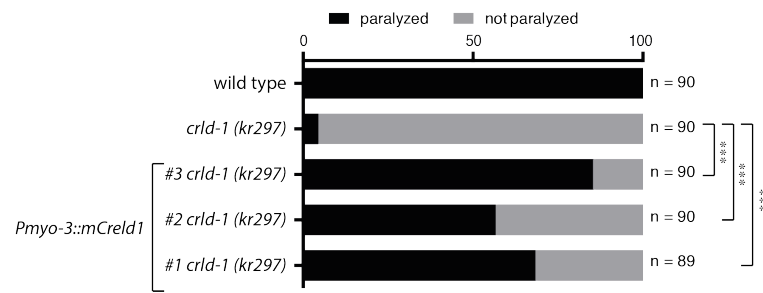

Supplement: supp [file elife-39649-supp-v1.zip]

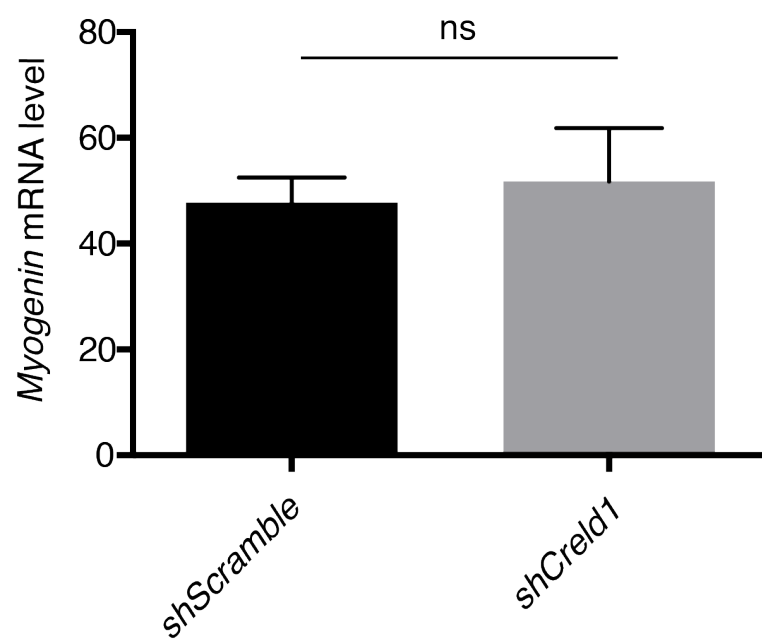

Supplement: supp [file elife-39649-supp-v1.zip]
